# Supplementary material for: Mapping the ethical aspects in end-of-life care for persons with a severe and persistent mental illness: A scoping review of the literature
Source: Frontiers journal article supplement (doi:10.3389/fpsyt.2023.1094038), 2023-03-16
Supplement: Table_3.pdf [file Table_3.pdf]

### Annex 3: Summary of included articles and ethical aspects in End-of-life care for persons with SPMI

| number | Authors/year           | Article type          | Aims/description                                                                                                       | Ethical aspects and themes                                                                                                                                                                                                                                                                                             |
|--------|------------------------|-----------------------|------------------------------------------------------------------------------------------------------------------------|------------------------------------------------------------------------------------------------------------------------------------------------------------------------------------------------------------------------------------------------------------------------------------------------------------------------|
| 1      | Trachsel<br>2018       | opinion               | The ethical importance of assessing end-of-life care preferences in patients with severe and persistent mental illness | Risk of over-treatment<br>DMC is present<br>Do not express a wish for MAID more often<br>More research into palliative care approach                                                                                                                                                                                   |
| 2      | Stoll et al<br>2021    | Ethical argumentation | The way perceived burdensomeness influences the wish for hastened death in persons with SPMI                           | Importance of DMC – Autonomy contingent to perceive burdensomeness.<br>Risk of stigma and paternalism. Need to ‘competent supported DM’<br>Access to MAID<br>Loss of dignity<br>Physician trained to prevent suicide<br>Training and research needed<br>Palliative approach as beneficial<br>Development of guidelines |
| 3      | Hodel et al<br>2019    | Original research     | Survey regarding attitudes toward assisted suicide request in the context of SPMI in Swiss psychiatrists               | Autonomy versus care (prevention of suicide)<br>Responsibility towards vulnerable persons (non-abandonment)<br>Need for guidelines regarding DMC<br>More research needed towards a palliative care approach and sedation                                                                                               |
| 4      | Trachsel et al<br>2019 | Original research     | Survey regarding the acceptability of palliative care approaches for patients with SPMI in Swiss psychiatrists         | Risk of association between palliative care and loss of hope<br>Balancing cure and care<br>A palliative approach does not exclude recovery<br>More research needed (as a conceptual framework)                                                                                                                         |
| 5      | Butler et al<br>2018   | Retrospective study   | Study regarding access to specialist palliative care for persons with SPMI                                             | Access to specialist care is 3.5 times lower, needs and expectations are the same                                                                                                                                                                                                                                      |

|   |                     |                     |                                                                                                                   |                                                                                                                                                                                                                                                                                                                                                                    |
|---|---------------------|---------------------|-------------------------------------------------------------------------------------------------------------------|--------------------------------------------------------------------------------------------------------------------------------------------------------------------------------------------------------------------------------------------------------------------------------------------------------------------------------------------------------------------|
|   |                     |                     |                                                                                                                   | <p>siloiing of care and bad coordination of it</p> <p>perceptions in healthcare workers regarding DMC</p> <p>stigma</p> <p>responsibility in offering continuity of care (society)</p> <p>more research</p> <p>nurse has an important role as facilitator and liaison</p>                                                                                          |
| 6 | Carlsson et al 2017 | Critical review     | Ethical and methodological issues in quantitative studies involving persons with SPMI                             | <p>Access to being involved in qualitative research is hindered by</p> <p>assumptions regarding vulnerability (protectionism)</p> <p>Need to consult ethics commission</p> <p>Upholding the principles declaration Helsinki</p> <p>Importance of a balanced Informed Consent</p> <p>Involving patients in research</p> <p>More research could mean less stigma</p> |
| 7 | Decorte et al 2020  | Opinion/case report | Sketching a palliative care model for persons with SPMI: 'Oyster care'                                            | <p>Unfair treatment of a vulnerable group</p> <p>Need of a palliative approach, causing less harm – doing good</p> <p>Dynamics regarding autonomy and coercion</p> <p>Dynamics regarding MAID</p> <p>Need for more research and societal responsibility</p> <p>Role of care professionals as 'substitute family members'</p>                                       |
| 8 | Dierickx et al 2017 | Retrospective study | Analysis of officially reported cases of euthanasia for persons with psychiatric disorders or dementia in Belgium | <p>Assessment of DMC</p> <p>Vulnerability</p> <p>Importance of accessibility of MAID</p> <p>Need for quality guidelines</p>                                                                                                                                                                                                                                        |
| 9 | Trachsel et al 2016 | opinion             | Definition, scope, benefits and risks regarding palliative psychiatry for persons with SPMI                       | <p>A palliative approach can alleviate suffering and improve QOL</p> <p>Debate regarding futility necessary</p> <p>A palliative approach is not opposite to recovery</p> <p>Negative connotations with EOL</p> <p>Controversy regarding palliative sedation and positioning toward MAID</p> <p>Impaired DMC as a barrier</p> <p>More research needed</p>           |

|    |                       |                        |                                                                                        |                                                                                                                                                                                                                                                                                                                                                                                                                                                                                                                        |
|----|-----------------------|------------------------|----------------------------------------------------------------------------------------|------------------------------------------------------------------------------------------------------------------------------------------------------------------------------------------------------------------------------------------------------------------------------------------------------------------------------------------------------------------------------------------------------------------------------------------------------------------------------------------------------------------------|
| 10 | Baruth et al<br>2021  | Systematic<br>review   | End-of-life care in<br>schizophrenia                                                   | Positioning of a palliative approach<br>DMC/autonomy: role of pathology in decision-making?<br>Refusal of life sustaining treatment<br>Need for ethical analysis in DM process<br>Coercion and the role of the guardian/surrogate decision-maker<br>Negative behavior and communication-problems limit access to care<br>Stigma<br>Importance of ACP<br>Role of ethics commission and ethical expert<br>Importance of early detection and training to limit disparity<br>Virtues: being compassionate, having patience |
| 11 | Roberts et al<br>2004 | Ethical analysis       | Ethical use of long-acting<br>medications in treatment of<br>SPMI                      | Autonomy: DMC and doubt about 'authentic choice'<br>Role of coercion: how to do no harm, do good and be just?                                                                                                                                                                                                                                                                                                                                                                                                          |
| 12 | Deodohar<br>2016      | Retrospective<br>study | Current trends and future<br>directions in end-of-life care<br>and psychiatry in India | Principles of a 'good death': dignity, privacy and spiritual support<br>Four principles of biomedical ethics are essential in EOL care<br>Need for ACP<br>Futility debate<br>Psychiatrist as ethical expert<br>Chances for palliative psychiatry<br>Access to palliative care is limited                                                                                                                                                                                                                               |
| 13 | Levitt et al<br>2020  | opinion                | Reflections regarding the<br>concept of futility in psychiatry                         | Do no harm: prevention of therapeutic stubbornness<br>Doing justice to autonomy: give patients a voice,<br>against 'beneficent paternalism'<br>Beneficence: improving QOL<br>Importance of staging in palliative psychiatry<br>Futility does not equal terminal or loss of hope. There is room for recovery<br>Need of safe places to dialogue                                                                                                                                                                         |

|    |                        |                     |                                                                                                                                              |                                                                                                                                                                                                                                                                                                                                                                     |
|----|------------------------|---------------------|----------------------------------------------------------------------------------------------------------------------------------------------|---------------------------------------------------------------------------------------------------------------------------------------------------------------------------------------------------------------------------------------------------------------------------------------------------------------------------------------------------------------------|
| 14 | Lopez-Castroman 2017   | Opinion             | Reflections regarding the practice of psychiatric euthanasia                                                                                 | MAID in psychiatry as controversial theme<br>Importance of assessing DMC<br>Palliative psychiatry as alternative                                                                                                                                                                                                                                                    |
| 15 | Forrster et al 2006    | Qualitative study   | Ethico-legal issues in relation to end-of-life care and institutional mental health in Queensland, Australia                                 | Perceived caregiver dilemma: providing death with dignity versus risk of legal pursuit<br>Autonomy/DMC related issue: ACP not possible because authentic informed consent is not possible<br>Need for good education in care professionals so to better understand EOL legal issues<br>Some care professionals perceive not providing reanimation as 'death making' |
| 16 | Lindblad et al 2019    | opinion             | Reflections regarding the idea of a palliative care approach in psychiatry                                                                   | A separate definition might lead to more stigma<br>Palliative care has a connotation with the terminal phase<br>What is the relation between a palliative care approach and MAID?<br>Need for more research and practice-based examples                                                                                                                             |
| 17 | Verhofstadt et al 2020 | survey              | Belgian psychiatrists' attitudes towards, and readiness to engage in euthanasia assessment procedures with adults with psychiatric disorders | Psychiatrists may have moral reasons not to participate in the euthanasia assessment procedure<br>Reference to the general ethical debate regarding euthanasia in this context<br>Questions regarding the accessibility of MAID for the target group<br>More research needed regarding values, norms and religious aspects in euthanasia and psychiatric suffering  |
| 18 | Harman 2017            | Retrospective study | Psychiatric and palliative care in the Intensive care unit                                                                                   | DMC is complex in the SPMI target group. This affects ACP<br>Surrogate decision-makers and guardians have an important role (if they can be found)<br>Palliative care needs to compensate for a lack of ACP, DMC and social network                                                                                                                                 |
| 19 | Ebenau et al 2020      | Qualitative study   | Experiences of healthcare professionals, volunteers and experts-by-experience, of                                                            | Stigma<br>Virtue: building a relationship of trust                                                                                                                                                                                                                                                                                                                  |

|    |                            |                   |                                                                                                            |                                                                                                                                                                                                                                                                                                                                                                                                                                                                                                  |
|----|----------------------------|-------------------|------------------------------------------------------------------------------------------------------------|--------------------------------------------------------------------------------------------------------------------------------------------------------------------------------------------------------------------------------------------------------------------------------------------------------------------------------------------------------------------------------------------------------------------------------------------------------------------------------------------------|
|    |                            |                   | Palliative care for persons with substance use disorder and multiple problems in the Netherlands           | <p>Siloing in care, bad coordination, limited resources and late detection</p> <p>Need of consultation, training and creativity</p> <p>Autonomy/DMC: patients sometimes refuse life-saving treatment</p> <p>Dilemma: Access to pain medication in persons know for substance-abuse?</p> <p>Virtue: responsibility (especially incases with limited social network)</p> <p>Virtues: alert, active, taking time, respect, non-judgmental, non-hierarchical</p> <p>Access to care: homelessness</p> |
| 20 | Ebenau et al 2018          | methodological    | A study protocol regarding palliative care for persons with a substance use disorder and multiple problems | <p>Homelessness and limited social network</p> <p>Strong autonomy regarding EOLD decisions, but limited communication</p> <p>Methodological: time to decide, IC, anonymity, experts by experience consulted, tailored interviews (time-management)</p>                                                                                                                                                                                                                                           |
| 21 | Torres-Gonzalez et al 2014 | review            | Unmet needs in the management of schizophrenia                                                             | <p>Stigma</p> <p>Importance of respecting autonomy</p> <p>Justice: relation between unmet needs and suicide/lower life expectancy</p>                                                                                                                                                                                                                                                                                                                                                            |
| 22 | Shalev et al 2017          | editorial         | End-of-life care in patients with severe mental illness                                                    | <p>Limited access to palliative care as ethical dilemma</p> <p>Access is limited by: siloing, limited resources (care models now are expensive and offer limited QOL), stigma and perceptions of DMC, lack of expertise and training</p> <p>Opportunities lie in the use of technology, a multidisciplinary approach, palliative approach and community-based models</p>                                                                                                                         |
| 23 | Kirby 2019                 | Original research | Two models to balance competing interests and obligations in mental healthcare practice and policy         | <p>Value-based deliberative tool</p> <p>Using moral relational space (power free) in therapeutic engagement</p>                                                                                                                                                                                                                                                                                                                                                                                  |

|    |                      |                     |                                                                                      |                                                                                                                                                                                                                                                                                                                                                                                                                                                                                                                                                            |
|----|----------------------|---------------------|--------------------------------------------------------------------------------------|------------------------------------------------------------------------------------------------------------------------------------------------------------------------------------------------------------------------------------------------------------------------------------------------------------------------------------------------------------------------------------------------------------------------------------------------------------------------------------------------------------------------------------------------------------|
| 24 | West et al<br>2020   | Scoping review      | Exploring the end-of-life needs of Homeless Persons and Barriers to appropriate care | <p>Dilemma: autonomy versus care</p> <p>Paternalism with regard to ACP</p> <p>Virtues: respect, dignity, responsibility</p> <p>Access to palliative care limited by: -stigma and discrimination</p> <p>-Noncompliance and disturbing behavior</p> <p>-Drug seeking behavior</p> <p>-limited social network</p> <p>-siloing in care and insufficient specialization towards the target group</p> <p>Good practices: enhancing ACP, avoiding 'paternalistic' hospital setting (connotation of coercion), providing care where the patient actually lives</p> |
| 25 | Strand et al<br>2020 | opinion             | Reflection on and clinical implications of a palliative care approach in psychiatry  | <p>A palliative care approach can contribute to the non-maleficence and beneficence principles</p> <p>Questions regarding staging</p> <p>Importance of shared decision-making and patient centeredness</p> <p>Negative connotation with EOL</p> <p>Relation with regard to recovery</p> <p>Importance of an ethical/value-based care approach</p>                                                                                                                                                                                                          |
| 26 | Etgen<br>2020        | Retrospective study | Care series of introducing palliative care consultation in psychiatry                | Possible alternative for the existing limited access to palliative care consultation                                                                                                                                                                                                                                                                                                                                                                                                                                                                       |
| 27 | Grassi et al<br>2020 | Narrative review    | Problems and solutions regarding cancer and severe mental illness                    | <p>Limited access to care, social isolation</p> <p>Stigma (prejudice about patients being unmanageable)</p> <p>attitudes and virtues: dignity, hope, respect, non-abandonment</p> <p>Problems related to DMC and surrogate decision-makers</p>                                                                                                                                                                                                                                                                                                             |
| 28 | Lemon et al<br>2016  | Survey/pilot study  | Trust and the dilemmas of suicide risk assessment in non-                            | <p>Key value: trust (towards the client, tools and colleagues)</p> <p>Important role of training and professionalism</p>                                                                                                                                                                                                                                                                                                                                                                                                                                   |

|    |                     |             |                                                                                                                                   |                                                                                                                                                                                                                                                                                                                                                                                                             |
|----|---------------------|-------------|-----------------------------------------------------------------------------------------------------------------------------------|-------------------------------------------------------------------------------------------------------------------------------------------------------------------------------------------------------------------------------------------------------------------------------------------------------------------------------------------------------------------------------------------------------------|
|    |                     |             | government mental health services in Australia                                                                                    |                                                                                                                                                                                                                                                                                                                                                                                                             |
| 29 | Terpstra et al 2014 | Case report | Palliative care for terminally ill individuals with schizophrenia                                                                 | <p>Access to care palliative care is limited due to lack of insurance, different experience of pain in persons with SPMI, safety-issues, smoking</p> <p>Difficulties regarding DMC and communication</p> <p>Need of better collaboration and sharing of experiences between care professionals</p> <p>Role of care professionals as 'substitute family members'</p> <p>Importance of death with dignity</p> |
| 30 | Terpstra et al 2012 | opinion     | Hospice and palliative care for terminally ill individuals with serious and persistent mental illness                             | <p>Barriers to care are manyfold, f.i. Anxiety in care professionals to bring up the topic of EOL and stigma</p> <p>Central role of DMC</p> <p>Good practice: cross training among care professionals in mental healthcare and palliative care</p> <p>Attitudes: compassion, person-centeredness</p>                                                                                                        |
| 31 | Irwin et al 2014    | review      | Cancer care for individuals with schizophrenia                                                                                    | <p>Central role of DMC</p> <p>Prejudice regarding vulnerability</p> <p>Stigma</p> <p>Disparities (insurance, self-stigma, exclusion from research, communication-issues, homelessness)</p> <p>Virtues: responsibility, trust</p> <p>Importance of clarity in guidelines and the division of tasks in EOL-care</p>                                                                                           |
| 32 | Guidry-Grimes 2019  | Case report | A case report regarding a very ill, homeless and psychiatrically complex person, told from the perspective of an ethics counselor | The clients fall between the 'mazes of the net' in every aspect: socially, legally, imparities regarding access to quality care                                                                                                                                                                                                                                                                             |

|    |                    |                |                                                                                                                                                   |                                                                                                                                                                                                                                                                                                                                                                                                                                                                                                                                                                                                                                                                                                          |
|----|--------------------|----------------|---------------------------------------------------------------------------------------------------------------------------------------------------|----------------------------------------------------------------------------------------------------------------------------------------------------------------------------------------------------------------------------------------------------------------------------------------------------------------------------------------------------------------------------------------------------------------------------------------------------------------------------------------------------------------------------------------------------------------------------------------------------------------------------------------------------------------------------------------------------------|
|    |                    |                |                                                                                                                                                   | <p>Autonomy/DMC related dilemma's: absence of surrogate decision-maker or family, refusal of life sustaining treatment, risk of paternalism</p> <p>Ethical advisor as an ambassador between several institutions and as someone with a unique point of view. Can give support in cases of moral distress</p> <p>Risk of being 'given up': cure versus care debate + limits to care?</p> <p>No ACP</p> <p>Stigma by care professionals (different attitude towards elderly patients)</p> <p>Siloing</p> <p>Wrong use of 'comfort care' (giving up on patient)</p> <p>Core Values and attitudes: humility, creativity, trust, responsibility</p> <p>Importance of a multidisciplinary approach to care</p> |
| 33 | Roberts et al 2015 | Survey/pilot   | Attunement and alignment of persons with schizophrenia and their preferred alternative decision-makers regarding treatment and research decisions | <p>Individuals generally make decisions according to their values (autonomy, justice, non-maleficence and beneficence)</p> <p>Central role of assessing DMC and the role of the guardian</p> <p>Decisions of guardians and patients are mostly aligned</p>                                                                                                                                                                                                                                                                                                                                                                                                                                               |
| 34 | Nisavic et al 2019 | Case report    | A 27 year-old woman with opioid use disorder and suicidal ideation                                                                                | <p>Dilemma: how to assess care and pain medication is someone with drug seeking behavior?</p> <p>Values: trust, do no harm</p>                                                                                                                                                                                                                                                                                                                                                                                                                                                                                                                                                                           |
| 35 | Donald et al 2019  | Scoping review | Palliative care needs for persons with SPMI                                                                                                       | <p>The voice of the client is rarely heard, due to a lack of research and perceptions about autonomy and DMC</p> <p>Siloing of care and lack of specialization results in limited access</p> <p>Advantages of a palliative care approach and cross-training</p> <p>The importance of care professionals as advocates</p>                                                                                                                                                                                                                                                                                                                                                                                 |



|    |                     |                   |                                                                                                                            |                                                                                                                                                                                                                                                                                                         |
|----|---------------------|-------------------|----------------------------------------------------------------------------------------------------------------------------|---------------------------------------------------------------------------------------------------------------------------------------------------------------------------------------------------------------------------------------------------------------------------------------------------------|
|    |                     |                   |                                                                                                                            | Importance of training in care professionals to do EOL conversations                                                                                                                                                                                                                                    |
| 36 | Le Melle et al 2005 | Case report       | Heart transplant in a young man with schizophrenia                                                                         | Stigma and discrimination based on diagnosis of SPMI<br>Access to care limited/denied<br>Wrong use of 'comfort care' (giving up on patient)<br>Importance of the healthcare team and social network<br>Important value: trust<br>Dilemma: DMC in ACP<br>Role of ethics commission in resolving the case |
| 37 | Weimand et al       | Descriptive study | A Qualitative/phenomenographic study regarding life sharing experiences of relatives of persons with severe mental illness | Key values and attitudes: trust, love, compassion, responsibility<br>Ethical dilemma: autonomy versus coercion when confronted with suicidality and aggression                                                                                                                                          |
| 38 | Gloecker et al 2021 | Pilot survey      | Nurse's view on palliative care for those diagnosed with SPMI in Switzerland                                               | Little support for coercion, in favor of QOL<br>Autonomy as central value – sometimes dilemmas arise with regard to optimal care/beneficence<br>Palliative care approach as an ethical alternative: cure (harm) versus care                                                                             |
| 39 | Coulter et al 2021  | opinion           | Evaluating ineffective treatments: a proposed model for discussing futility in psychiatric illness                         | Futility in psychiatry is an ethical problem, balancing autonomy, beneficence and non-maleficence<br>Palliative psychiatry as valid alternative<br>Decisions should be made with regard to quality of life, rather than based on than DMC                                                               |
| 40 | Stoll et al 2021    | Survey            | Attitudes among Swiss psychiatrists with regard to compulsory interventions in SPMI and EOL situations                     | Dilemma: autonomy versus paternalism<br>Beneficence and benefice as crucial to the psychiatrist's role<br>Importance of ethics support<br>DMC as important dilemma<br>legislation                                                                                                                       |

|    |                        |                   |                                                                                                                                   |                                                                                                                                                                                                                                                                                                                               |
|----|------------------------|-------------------|-----------------------------------------------------------------------------------------------------------------------------------|-------------------------------------------------------------------------------------------------------------------------------------------------------------------------------------------------------------------------------------------------------------------------------------------------------------------------------|
| 41 | Knippenberg et al 2020 | Qualitative study | Patient semi-structured interviews with regard to severe mental illness and palliative care                                       | <p>Little research has been done</p> <p>Difficulties: communication, insight, medication, negative experiences with care professionals</p> <p>Importance of ethical standards in research</p> <p>Access to care limited: patients are reluctant to discuss EOL topics</p> <p>Important role of trusted care professionals</p> |
| 42 | Scolan et al 2013      | Case study        | Ethical dilemma of the therapeutic decisions in the care for a patient with severe anorexia nervosa                               | <p>Refusal of life sustaining treatment</p> <p>Balancing autonomy, non-maleficence and beneficence</p> <p>Crucial role of DMC</p> <p>legislation</p>                                                                                                                                                                          |
| 43 | Lopez et al 2009       | Case report       | Medical futility in psychiatry: palliative care and hospice care as a last resort in the treatment of refractory anorexia nervosa | <p>Need for ethics support in difficult cases</p> <p>Palliative care is a good alternative in some situations with regard to QOL</p> <p>DMC as a central dilemma</p> <p>legislation</p>                                                                                                                                       |
| 44 | Taylor et al 2018      | Case report       | A clinical ethics case report on a case of refractory schizophrenia, attempted suicide and withdrawal of life support             | <p>Plead to take seriously the mental suffering and the wish for ACP</p> <p>Role of ethics commission in supporting healthcare workers in difficult EOL cases</p>                                                                                                                                                             |
| 45 | Moonen et al 2015      | Qualitative study | Experiences of psychiatric nurses in Flanders (Belgium) in dealing with existential suffering of patients with SPMI               | <p>Important values: autonomy, trust</p> <p>Risk of paternalistic approach</p> <p>Need for more research</p> <p>Importance of the development of a palliative care approach</p> <p>Context of euthanasia and the ethical debate regarding it</p>                                                                              |
| 46 | Elie et al 2017        | Survey            | A comparative cross-sectional study regarding EOL care preferences in patients with SPMI and chronic medical conditions           | <p>Importance of palliative psychiatry with focus on QOL</p> <p>Assessment of Autonomy and DMC in the context of treatment refusal</p> <p>More research needed on ethical themes in this target group</p> <p>Persons with SPMI have no negative attitude towards MAID</p>                                                     |

|    |                        |                   |                                                                                                                                         |                                                                                                                                                                                                                                                                                                      |
|----|------------------------|-------------------|-----------------------------------------------------------------------------------------------------------------------------------------|------------------------------------------------------------------------------------------------------------------------------------------------------------------------------------------------------------------------------------------------------------------------------------------------------|
| 47 | Den Boer et al<br>2019 | Systematic review | A systematic review in palliative care tools and interventions for persons with severe mental illness                                   | Very little research regarding the target group<br>Conversations about EOL with persons with SPMI are possible should be encouraged<br>Access to somatic care is limited due to siloing of care and difficulties in communication                                                                    |
| 48 | MCGorry et al<br>2012  | opinion           | Commentary on 'palliative models of care for later stages of mental disorder: maximizing recovery, maintaining hope and building morale | Importance of a staging model that has room for upward and downward movement<br>Negative connotations with regard to the concept 'palliative care'<br>Siloing of care                                                                                                                                |
| 49 | Berk et al<br>2012     | Literature review | Palliative models of care for later stages of mental disorder                                                                           | Importance of a staging model in SPMI<br>Palliative care approach as beneficial to QOL<br>Risk of doing harm (over-treatment)<br>Stigma towards persons with SPMI                                                                                                                                    |
| 50 | Woods et al<br>2008    | Systematic review | Palliative care for persons with SPMI                                                                                                   | Very little research available<br>DMC as central theme<br>Key values and attitudes: respect, truthfulness, dignity, hope, non-abandonment, compassion, power<br>ACP not self-evident<br>Access to care restricted<br>Lack of social network, role of substitute decision-makers<br>Treatment refusal |
